# Supplementary material for: The Effects of Insulin on Immortalized Rat Schwann Cells, IFRS1
Source: MDPI journal article supplement (doi:10.3390/ijms22115505), 2021-05-23
Supplement: s1 [file s1]

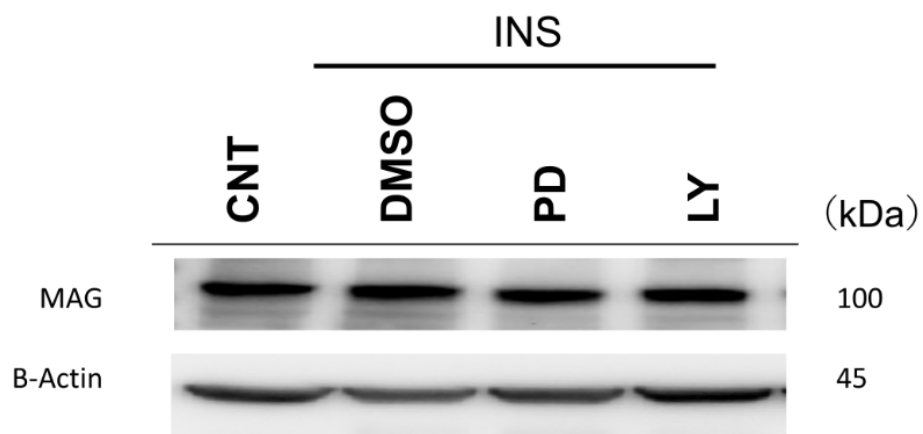

**Figure S1.** Western blot data showing the expression of MAG through insulin stimulation, and the effect of LY294002 and PD98059 on MAG.
